# Supplementary material
Source: PubMed Central journal article supplement (PMC395817)
Supplement: cmaj_170_9_1421__1.pdf [file cmaj_170_9_1421__1.pdf]

**Table 1: Genetics and life insurance law in Europe**

| Country        | Moratorium*                                                               | Legislation† | Guidelines‡ | Oviedo Convention§<br>ratified | Other                                                                                                                                                                                                                            |
|----------------|---------------------------------------------------------------------------|--------------|-------------|--------------------------------|----------------------------------------------------------------------------------------------------------------------------------------------------------------------------------------------------------------------------------|
| Austria        | No                                                                        | Yes          | No          | No                             |                                                                                                                                                                                                                                  |
| Belgium        | No                                                                        | Yes          | No          | No                             |                                                                                                                                                                                                                                  |
| Bulgaria       | No                                                                        | No           | No          | Yes                            | Constitutional amendment prohibiting genetic discrimination introduced in National Assembly in 2002                                                                                                                              |
| Cyprus         | No                                                                        | No           | No          | Yes                            |                                                                                                                                                                                                                                  |
| Czech Republic | No                                                                        | No           | No          | Yes                            |                                                                                                                                                                                                                                  |
| Croatia        | No                                                                        | No           | No          | Yes                            |                                                                                                                                                                                                                                  |
| Denmark        | No                                                                        | Yes          | Yes         | Yes                            |                                                                                                                                                                                                                                  |
| Estonia        | No                                                                        | Yes          | No          | Yes                            |                                                                                                                                                                                                                                  |
| Finland        | Yes<br>(unlimited amount;<br>no expiry)                                   | No           | Yes         | No                             |                                                                                                                                                                                                                                  |
| France         | Yes<br>(unlimited amount;<br>expires 2004)                                | Yes          | Yes         | No                             |                                                                                                                                                                                                                                  |
| Germany        | Yes<br>(limited amount;<br>expires 2006)                                  | No           | Yes         | No                             | Parliamentary commission has declared insurers should not use genetic test results                                                                                                                                               |
| Georgia        | No                                                                        | Yes          | No          | Yes                            |                                                                                                                                                                                                                                  |
| Greece         | Partial                                                                   | No           | Yes         | Yes                            |                                                                                                                                                                                                                                  |
| Hungary        | No                                                                        | No           | Yes         | Yes                            |                                                                                                                                                                                                                                  |
| Iceland        | No                                                                        | No           | No          | No                             | Bill has been presented but not yet enacted                                                                                                                                                                                      |
| Ireland        | Yes<br>(limited amount;<br>some conditions are<br>excluded; expires 2005) | No           | No          | No                             |                                                                                                                                                                                                                                  |
| Italy          | No                                                                        | No           | Yes         | No                             | Guidelines for genetic testing to be adopted shortly by ministry of health                                                                                                                                                       |
| Lithuania      | No                                                                        | No           | No          | Yes                            |                                                                                                                                                                                                                                  |
| Luxembourg     | No                                                                        | Yes          | Yes         | No                             |                                                                                                                                                                                                                                  |
| Moldova        | No                                                                        | No           | No          | Yes                            |                                                                                                                                                                                                                                  |
| Netherland     | No                                                                        | Yes          | Yes         | No                             |                                                                                                                                                                                                                                  |
| Norway         | No                                                                        | Yes          | Yes         | No                             |                                                                                                                                                                                                                                  |
| Portugal       | No                                                                        | No           | Yes         | Yes                            | A task force established by ministry of health has prepared key guidelines addressing genetic testing. Article 13 of the Portuguese Constitution could prevent insurers from discriminating on the basis of genetic test results |
| Romania        | No                                                                        | No           | No          | Yes                            |                                                                                                                                                                                                                                  |
| San Marino     | No                                                                        | No           | No          | Yes                            |                                                                                                                                                                                                                                  |

|                |                                                                           |     |     |     |                                                                                                                                                                                                                                                         |
|----------------|---------------------------------------------------------------------------|-----|-----|-----|---------------------------------------------------------------------------------------------------------------------------------------------------------------------------------------------------------------------------------------------------------|
| Slovakia       | No                                                                        | Yes | No  | Yes |                                                                                                                                                                                                                                                         |
| Slovenia       | No                                                                        | No  | No  | Yes | A Bill should be drawn up shortly specifically addressing human genetics                                                                                                                                                                                |
| Spain          | No                                                                        | No  | No  | Yes | Under current law, insurers do not have an <i>ex lege</i> right entitling them to gather genetic information concerning a potential applicant. The Spanish constitution could prevent insurers from discriminating on the basis of genetic test results |
| Sweden         | Yes<br>(limited amount;<br>expires Dec 2004)                              | Yes | Yes | No  |                                                                                                                                                                                                                                                         |
| Switzerland    | Yes                                                                       | Yes | Yes | No  |                                                                                                                                                                                                                                                         |
| Turkey         | Yes                                                                       | No  | No  | No  |                                                                                                                                                                                                                                                         |
| United Kingdom | Yes<br>(limited amount;<br>some conditions are<br>excluded; expires 2006) | No  | Yes | No  |                                                                                                                                                                                                                                                         |

\*Also includes voluntary agreements between governments and insurers. Partial = the insurer will not ask the applicant to undergo genetic testing but may request the results of genetic tests already taken by the applicant; limited amount = the insurer will not ask the applicant to undergo genetic testing or request the results of genetic tests already taken by the applicant unless the insurance policy asked for is over a given amount; unlimited amount = the insurer will never ask the applicant to undergo genetic testing or request the results of genetic tests already taken by the applicant.

†Genetic-specific legislation enacted, prohibiting genetic testing at large or access by insurers to genetic test results.

‡This covers any guidelines made by scientific or professional organizations restricting the use of genetic information.

§The Convention on Human Rights and Biomedicine. States that have ratified this Convention are bound by it. The Convention forbids any kind of discrimination against a person based on genetic heritage. Genetic testing should be permitted only for health reasons or research.
